# Supplementary material for: Fitness Costs of the Glutathione S-Transferase Epsilon 2 (L119F-GSTe2) Mediated Metabolic Resistance to Insecticides in the Major African Malaria Vector Anopheles Funestus
Source: MDPI journal article supplement (doi:10.3390/genes9120645), 2018-12-19
Supplement: s1 [file s1]

**Table S1:** Distribution of L119F-GSTe2 genotypes between oviposited and non oviposited females.

|                 | Oviposited females | Oviposited females |
|-----------------|--------------------|--------------------|
| <i>Genotype</i> |                    |                    |
| L119F-RR        | 16 (6.15)          | 10 (10)            |
| L119F-RS        | 97(37.31)          | 43(43)             |
| L119F-SS        | 147 (56,54)        | 47 (47)            |
| <i>Allele</i>   |                    |                    |
| 119F-R          | 24.80%             | 31.50%             |
| L119-S          | 75.20%             | 68.50%             |
