# Supplementary material for: Fitness Costs of the Glutathione S-Transferase Epsilon 2 (L119F-GSTe2) Mediated Metabolic Resistance to Insecticides in the Major African Malaria Vector Anopheles Funestus
Source: MDPI journal article supplement (doi:10.3390/genes9120645), 2018-12-19
Supplement: s1 [file s1]

**Table S2:** Change in the distribution of L119F-GSTe2 genotypes and pupae formation

| <b>Genotypes</b> | <b><i>Pupae D9 vs. Pupae D11</i></b> |                       | <b><i>Pupae D11 Vs. Pupae D13</i></b> |                       |
|------------------|--------------------------------------|-----------------------|---------------------------------------|-----------------------|
|                  | <b>Chi-square</b>                    | <b><i>P</i>-value</b> | <b>Chi-square</b>                     | <b><i>P</i>-value</b> |
| <b>RR</b>        | 3.24                                 | 0,07                  | 2.33                                  | 0.12                  |
| <b>RS</b>        | 8.96                                 | 0.0028*               | 2.34                                  | 0.12                  |
| <b>SS</b>        | 3.65                                 | 0,03*                 | 0.32                                  | 0.50                  |
